# Supplementary material for: Age, Body Mass Index, Tumor Subtype, and Racial and Ethnic Disparities in Breast Cancer Survival
Source: PubMed Central journal article supplement (PMC10600583; doi:10.1001/jamanetworkopen.2023.39584), 2023-10-25
Supplement: jamanetwopen-e2339584-s001.pdf [file jamanetwopen-e2339584-s001.pdf]

## Supplemental Online Content

Lipsyc-Sharf M, Ballman KV, Campbell JD, et al. Age, body mass index, tumor subtype, and racial and ethnic disparities in breast cancer survival. *JAMA Netw Open*. 2023;6(10):e2339584. doi:10.1001/jamanetworkopen.2023.39584

**eMethods.** Supplemental Methods

**eFigure 1.** Kaplan-Meier Estimates of Recurrence-Free Survival in Breast Cancer Subtype by Race and Ethnicity

**eFigure 2.** Kaplan-Meier Estimates of Overall Survival in Breast Cancer Subtype by Race and Ethnicity

**eFigure 3.** Kaplan-Meier Estimates of Recurrence-Free Survival in Age Category by Race and Ethnicity

**eFigure 4.** Kaplan-Meier Estimates of Overall Survival in Age Category by Race and Ethnicity

**eFigure 5.** Kaplan-Meier Estimates of Recurrence-Free Survival in Body Mass Index (BMI) Category by Race and Ethnicity

**eFigure 6.** Kaplan-Meier Estimates of Overall Survival in Body Mass Index (BMI) Category by Race and Ethnicity

**eReferences.**

This supplemental material has been provided by the authors to give readers additional information about their work.

## eMethods. Supplemental Methods

Pooled data from four clinical trials were included in this analysis:

Cancer and Leukemia Group B (CALGB) C9741, C49907, C40101, or North Central Cancer Treatment Group (NCCTG) N9831. Here we have included a short description of each of these clinical trials. Of note, all patients in these trials received chemotherapy. None of the patients with triple negative breast cancer in these trials received immunotherapy. Given the timing of these trials, administration of anti-HER2 therapy for patients with HER2-positive breast cancer was variable except in N9831 in which all patients received HER2-directed therapy. For additional details, please consult the full publications of these clinical trials.

**CALGB C9741:** This trial studied the efficacy and safety of sequential versus concurrent combination chemotherapy as well as the safety and efficacy of dose density of chemotherapy. Specifically, the four arms of the study included 1) sequential doxorubicin then paclitaxel and then cyclophosphamide, administered every 3 weeks; 2) sequential doxorubicin then paclitaxel and then cyclophosphamide, administered every 2 weeks; 3) concurrent doxorubicin and cyclophosphamide followed by paclitaxel, administered every 3 weeks; and 4) concurrent doxorubicin and cyclophosphamide followed by paclitaxel, administered every 2 weeks. The trial found that dose density improved disease-free survival (DFS) and overall survival (OS), and that there was no difference in DFS or OS between sequential and concurrent chemotherapy schedules.

**CALGB C49907:** This trial studied standard adjuvant chemotherapy regimens versus capecitabine in women ages 65 years and older with early-stage breast cancer and found that recurrence-free survival was significantly longer for patients receiving standard adjuvant chemotherapy than for patients receiving capecitabine. Patients that received standard chemotherapy received either CMF (cyclophosphamide, methotrexate, and fluorouracil) or AC (doxorubicin and cyclophosphamide).

**CALGB C40101:** This trial studied whether treatment with paclitaxel alone was non-inferior to treatment with doxorubicin and cyclophosphamide (AC) in adjuvant treatment of patients with 0 to 3 positive axillary lymph nodes. The trial found that, while paclitaxel was better tolerated than AC, the efficacy of paclitaxel was not non-inferior to AC.

**NCCTG N9831:** This trial studied trastuzumab administered either sequentially or concurrently with chemotherapy in adjuvant treatment of patients with early-stage HER2+ breast cancer and found that trastuzumab given concurrently with taxane chemotherapy improved DFS. Chemotherapy included treatment with doxorubicin and cyclophosphamide (AC) followed by either paclitaxel alone or paclitaxel plus trastuzumab.

**eFigure 1. Kaplan-Meier Estimates of Recurrence-Free Survival in Breast Cancer Subtype by Race and Ethnicity**

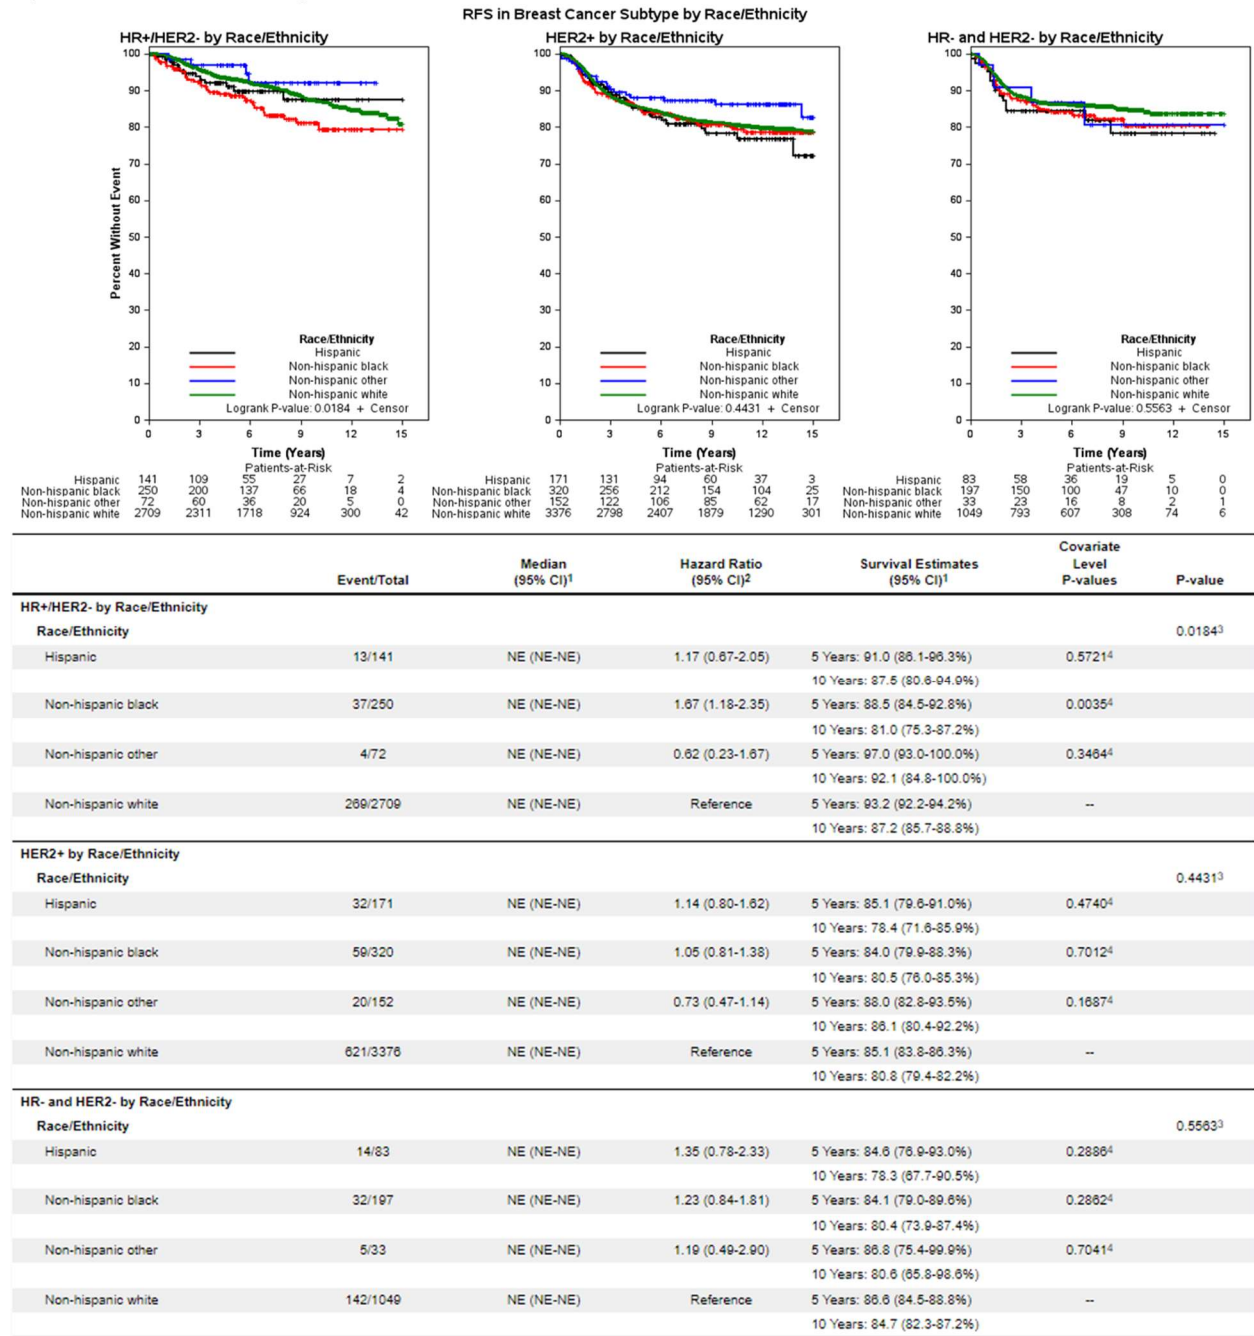

<sup>1</sup>Kaplan-Meier method; <sup>2</sup>Cox model; <sup>3</sup>Logrank test; <sup>4</sup>Wald Chi-Square test.

These supplemental Kaplan-Meier estimates show unadjusted survival by subgroup.

**Abbreviations:** RFS, recurrence-free survival; HR+, hormone receptor positive; HER2-, human epidermal growth factor receptor 2-negative; HER2+, human epidermal growth factor receptor 2-positive; HR-, hormone receptor negative.

**eFigure 2. Kaplan-Meier Estimates of Overall Survival in Breast Cancer Subtype by Race and Ethnicity**

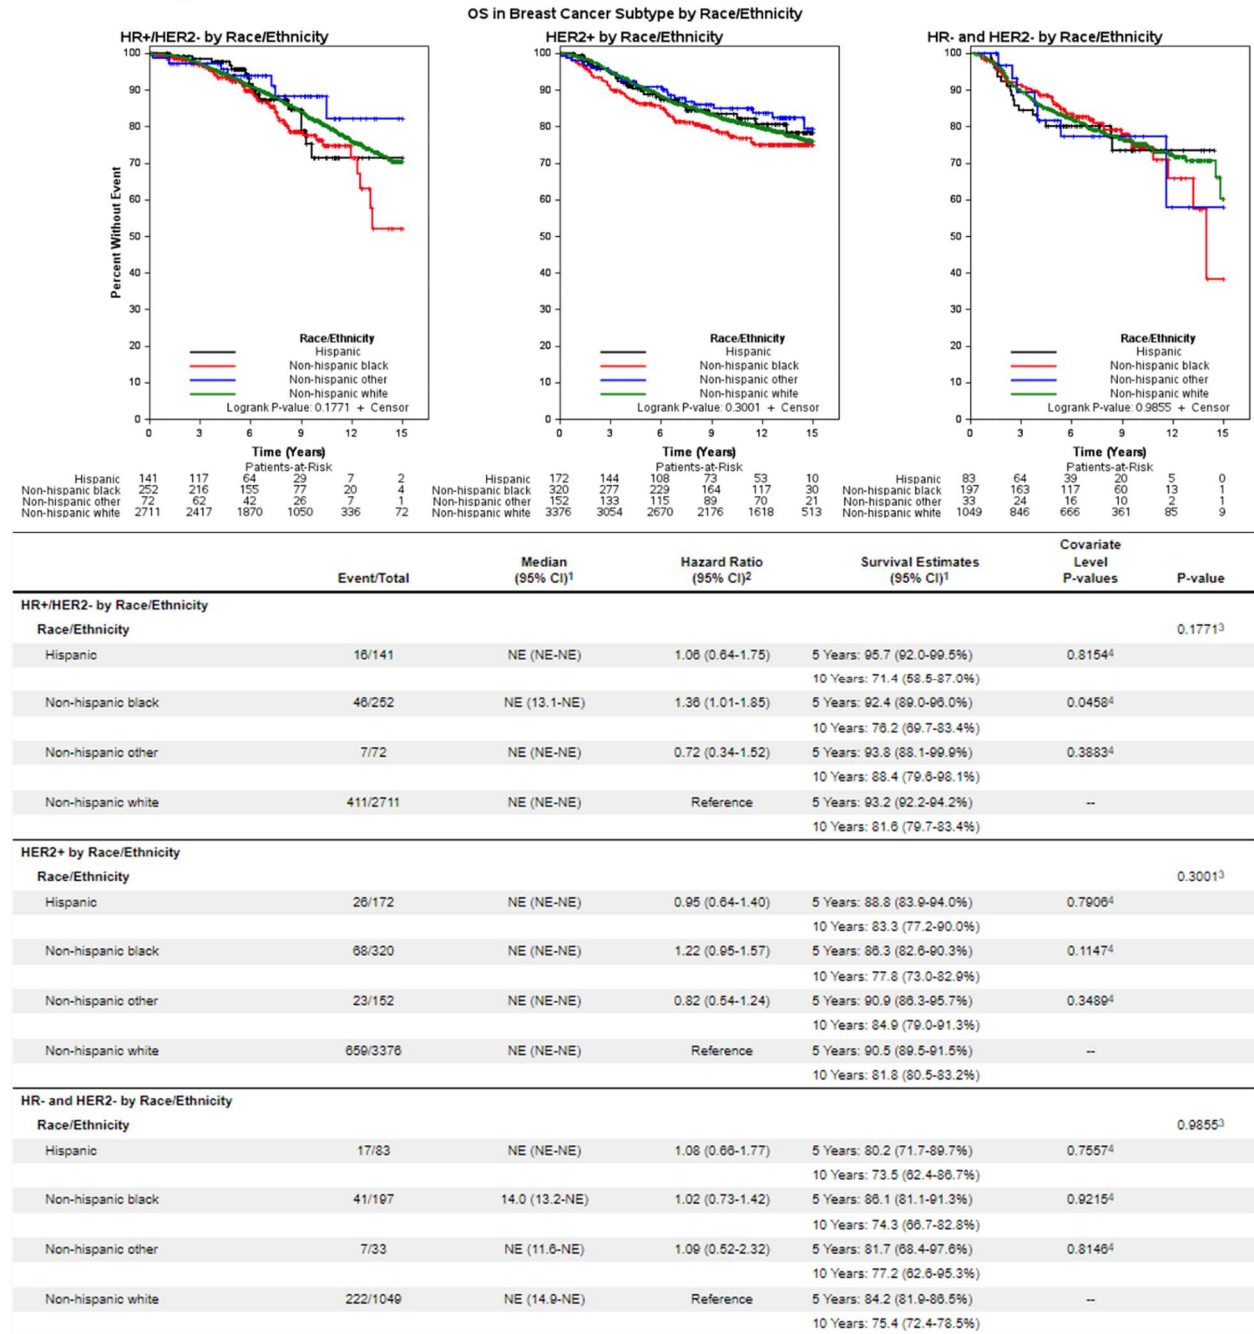

These supplemental Kaplan-Meier estimates show unadjusted survival by subgroup.  
**Abbreviations:** OS, overall survival; HR+, hormone receptor positive; HER2-, human epidermal growth factor receptor 2-negative; HER2+, human epidermal growth factor receptor 2-positive; HR-, hormone receptor negative.

**eFigure 3. Kaplan-Meier Estimates of Recurrence-Free Survival in Age Category by Race and Ethnicity**

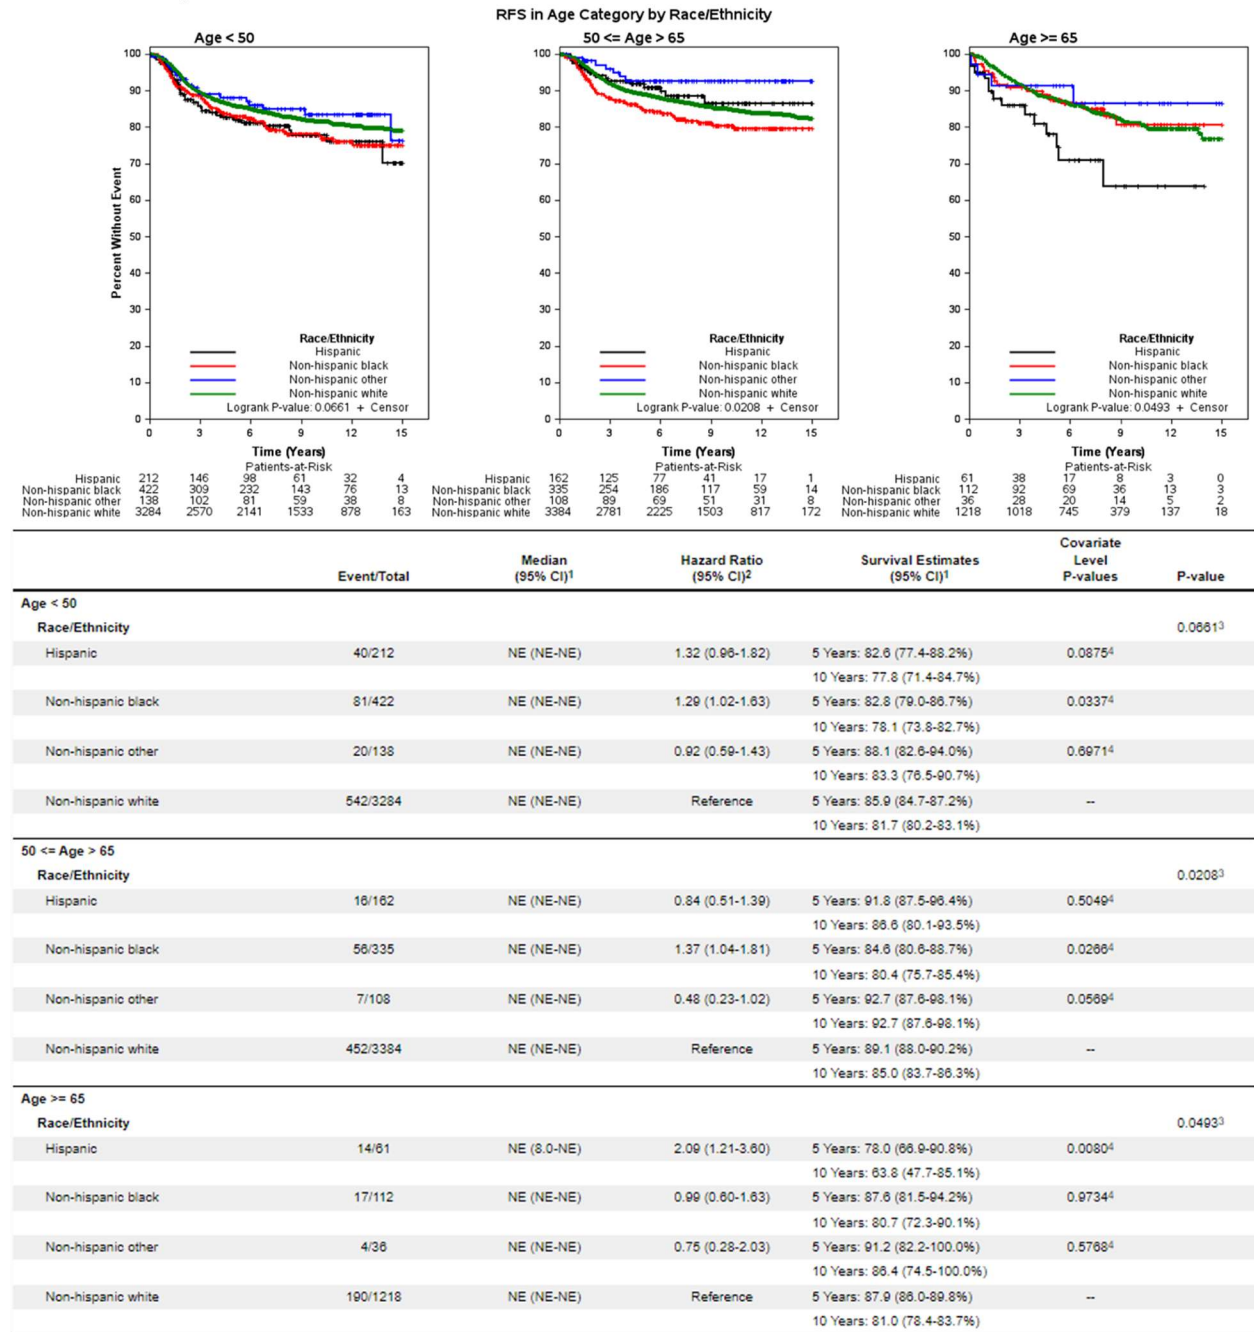

<sup>1</sup>Kaplan-Meier method; <sup>2</sup>Cox model; <sup>3</sup>Logrank test; <sup>4</sup>Wald Chi-Square test.

These supplemental Kaplan-Meier estimates show unadjusted survival by subgroup.

Age is represented in years.

**Abbreviations:** RFS, recurrence-free survival.

**eFigure 4. Kaplan-Meier Estimates of Overall Survival in Age Category by Race and Ethnicity**

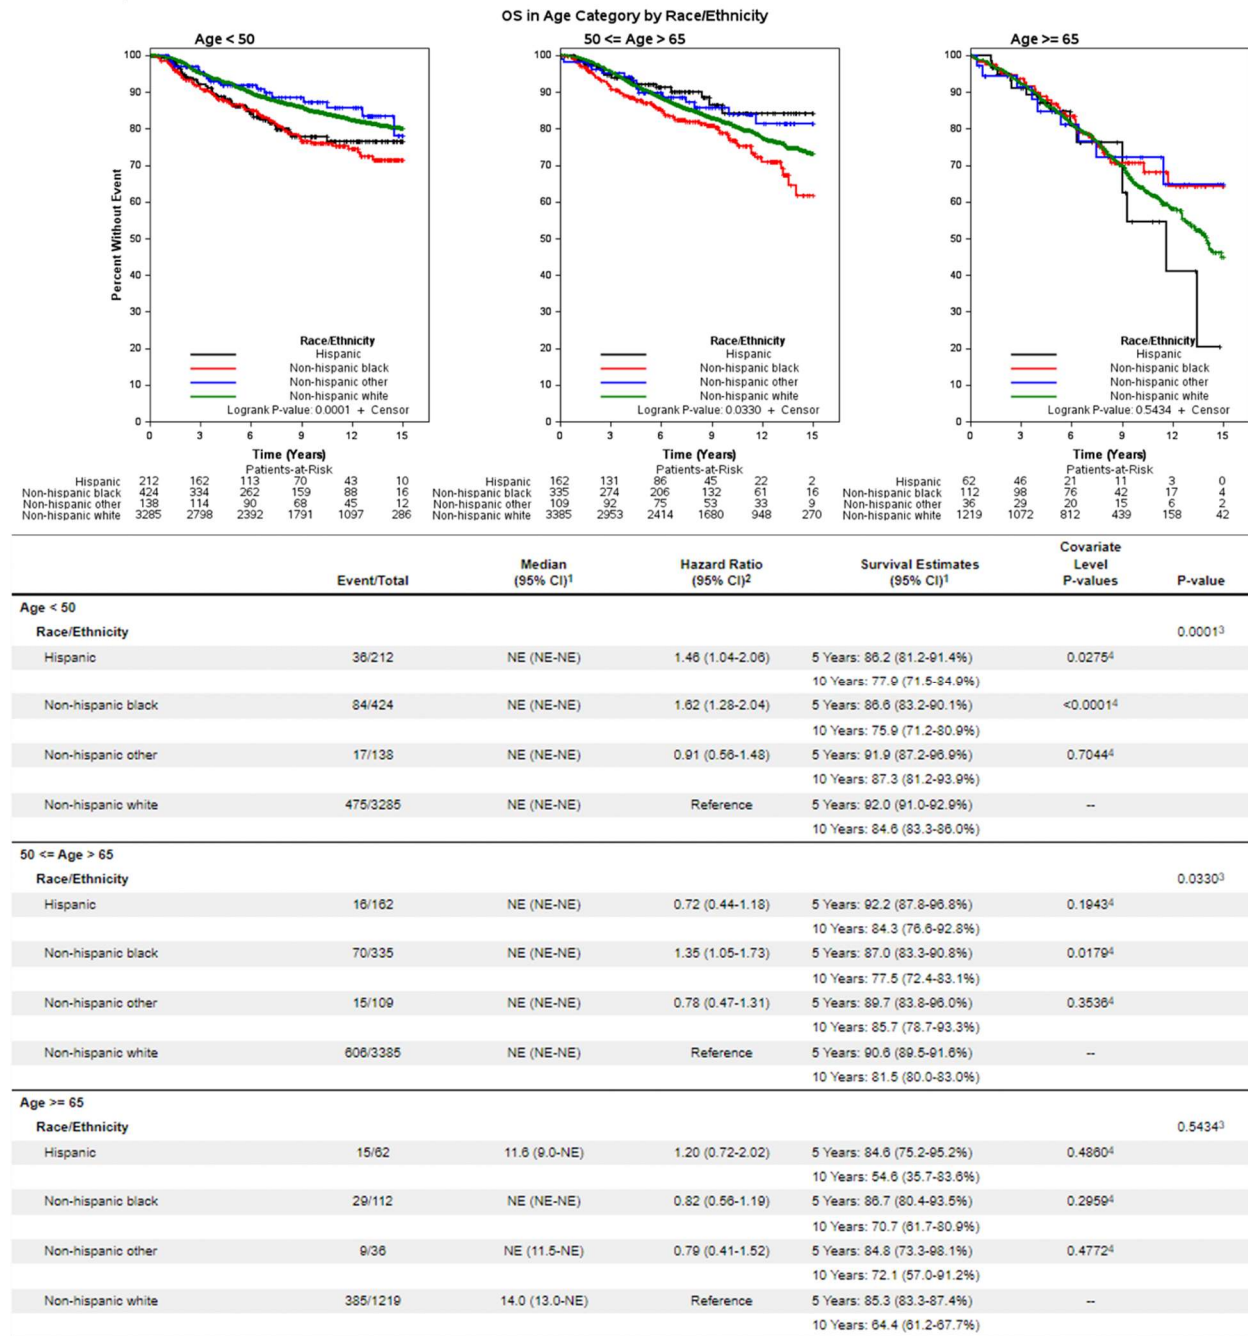

<sup>1</sup>Kaplan-Meier method; <sup>2</sup>Cox model; <sup>3</sup>Logrank test; <sup>4</sup>Wald Chi-Square test.

These supplemental Kaplan-Meier estimates show unadjusted survival by subgroup.

Age is represented in years.

**Abbreviation:** RFS, recurrence-free survival.



**eFigure 5. Kaplan-Meier Estimates of Recurrence-Free Survival in Body Mass Index (BMI) Category by Race and Ethnicity**

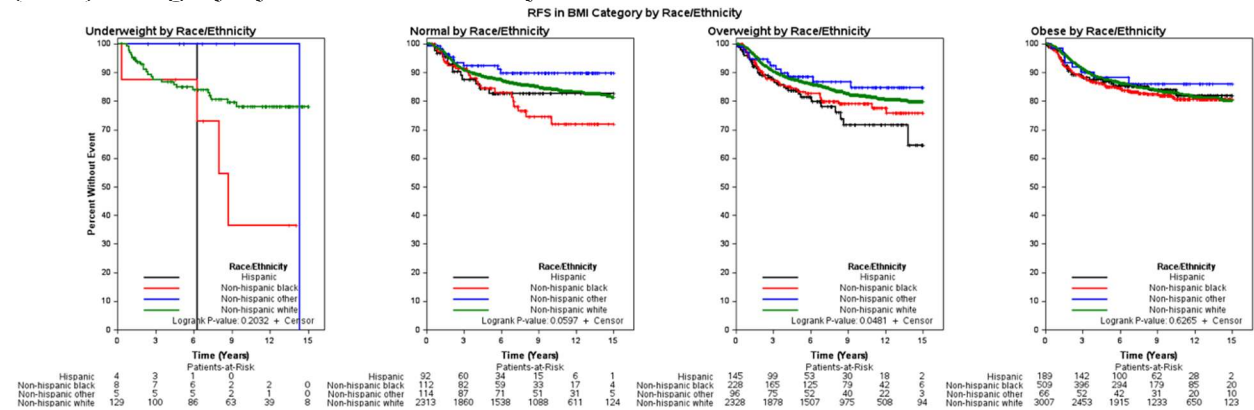

Body Mass Index (BMI) groups were determined based on National Institutes of Health definitions of underweight, normal weight, overweight, and obesity as follows: <18.5, 18.5 to <25, 25 to <30, ≥30 kg/m<sup>2</sup> respectively.<sup>24</sup>

|                                      | Event/Total | Median (95% CI) <sup>1</sup> | Hazard Ratio (95% CI) <sup>2</sup> | Survival Estimates (95% CI) <sup>1</sup>                        | Covariate Level P-values | P-value             |
|--------------------------------------|-------------|------------------------------|------------------------------------|-----------------------------------------------------------------|--------------------------|---------------------|
| <b>Underweight by Race/Ethnicity</b> |             |                              |                                    |                                                                 |                          |                     |
| <b>Race/Ethnicity</b>                |             |                              |                                    |                                                                 |                          | 0.2032 <sup>3</sup> |
| Hispanic                             | 1/4         | 6.3 (NE-NE)                  | 1.93 (0.26-14.52)                  | 5 Years: 100.0 (100.0-100.0%)<br>10 Years: 0.0 (NE-NE%)         | 0.5224 <sup>4</sup>      |                     |
| Non-hispanic black                   | 4/8         | 8.7 (6.3-NE)                 | 2.93 (1.01-8.50)                   | 5 Years: 87.5 (67.3-100.0%)<br>10 Years: 36.5 (12.4-100.0%)     | 0.0471 <sup>4</sup>      |                     |
| Non-hispanic other                   | 1/5         | 14.3 (NE-NE)                 | 0.97 (0.13-7.21)                   | 5 Years: 100.0 (100.0-100.0%)<br>10 Years: 100.0 (100.0-100.0%) | 0.9787 <sup>4</sup>      |                     |
| Non-hispanic white                   | 24/129      | NE (NE-NE)                   | Reference                          | 5 Years: 84.9 (78.7-91.6%)<br>10 Years: 78.2 (70.7-86.5%)       | --                       |                     |
| <b>Normal by Race/Ethnicity</b>      |             |                              |                                    |                                                                 |                          |                     |
| <b>Race/Ethnicity</b>                |             |                              |                                    |                                                                 |                          | 0.0597 <sup>3</sup> |
| Hispanic                             | 13/92       | NE (NE-NE)                   | 1.28 (0.74-2.24)                   | 5 Years: 84.4 (76.5-93.0%)<br>10 Years: 82.5 (74.2-91.8%)       | 0.3784 <sup>4</sup>      |                     |
| Non-hispanic black                   | 22/112      | NE (NE-NE)                   | 1.59 (1.03-2.45)                   | 5 Years: 84.4 (77.3-92.0%)<br>10 Years: 74.4 (65.1-85.1%)       | 0.0355 <sup>4</sup>      |                     |
| Non-hispanic other                   | 10/114      | NE (NE-NE)                   | 0.64 (0.34-1.20)                   | 5 Years: 92.3 (87.3-97.6%)<br>10 Years: 89.8 (84.0-96.1%)       | 0.1672 <sup>4</sup>      |                     |
| Non-hispanic white                   | 327/2313    | NE (NE-NE)                   | Reference                          | 5 Years: 88.3 (86.9-89.7%)<br>10 Years: 84.3 (82.7-85.9%)       | --                       |                     |
| <b>Overweight by Race/Ethnicity</b>  |             |                              |                                    |                                                                 |                          |                     |
| <b>Race/Ethnicity</b>                |             |                              |                                    |                                                                 |                          | 0.0481 <sup>3</sup> |
| Hispanic                             | 29/145      | NE (NE-NE)                   | 1.56 (1.07-2.28)                   | 5 Years: 83.7 (77.5-90.4%)<br>10 Years: 71.6 (62.1-82.6%)       | 0.0212 <sup>4</sup>      |                     |
| Non-hispanic black                   | 42/228      | NE (NE-NE)                   | 1.29 (0.94-1.77)                   | 5 Years: 83.2 (78.1-88.6%)<br>10 Years: 79.0 (73.3-85.2%)       | 0.1215 <sup>4</sup>      |                     |
| Non-hispanic other                   | 12/96       | NE (NE-NE)                   | 0.83 (0.47-1.48)                   | 5 Years: 88.6 (82.1-95.5%)<br>10 Years: 84.6 (76.6-93.4%)       | 0.5312 <sup>4</sup>      |                     |
| Non-hispanic white                   | 369/2328    | NE (NE-NE)                   | Reference                          | 5 Years: 87.3 (85.9-88.7%)<br>10 Years: 82.0 (80.2-83.7%)       | --                       |                     |
| <b>Obese by Race/Ethnicity</b>       |             |                              |                                    |                                                                 |                          |                     |
| <b>Race/Ethnicity</b>                |             |                              |                                    |                                                                 |                          | 0.6265 <sup>3</sup> |
| Hispanic                             | 27/189      | NE (NE-NE)                   | 1.06 (0.72-1.57)                   | 5 Years: 86.8 (81.8-92.0%)<br>10 Years: 83.9 (78.2-90.0%)       | 0.7608 <sup>4</sup>      |                     |
| Non-hispanic black                   | 82/509      | NE (NE-NE)                   | 1.15 (0.91-1.45)                   | 5 Years: 84.9 (81.7-88.2%)<br>10 Years: 81.9 (78.3-85.7%)       | 0.2512 <sup>4</sup>      |                     |
| Non-hispanic other                   | 8/66        | NE (NE-NE)                   | 0.82 (0.41-1.65)                   | 5 Years: 88.2 (80.3-96.8%)<br>10 Years: 86.1 (77.5-95.6%)       | 0.5781 <sup>4</sup>      |                     |
| Non-hispanic white                   | 449/3007    | NE (NE-NE)                   | Reference                          | 5 Years: 87.5 (86.2-88.7%)<br>10 Years: 83.2 (81.7-84.7%)       | --                       |                     |

<sup>1</sup>Kaplan-Meier method; <sup>2</sup>Cox model; <sup>3</sup>Logrank test; <sup>4</sup>Wald Chi-Square test.

These supplemental Kaplan-Meier estimates show unadjusted survival by subgroup.

**Abbreviations:** RFS, recurrence-free survival; BMI, body mass index.

**eFigure 6. Kaplan-Meier Estimates of Overall Survival in Body Mass Index (BMI) Category by Race and Ethnicity**

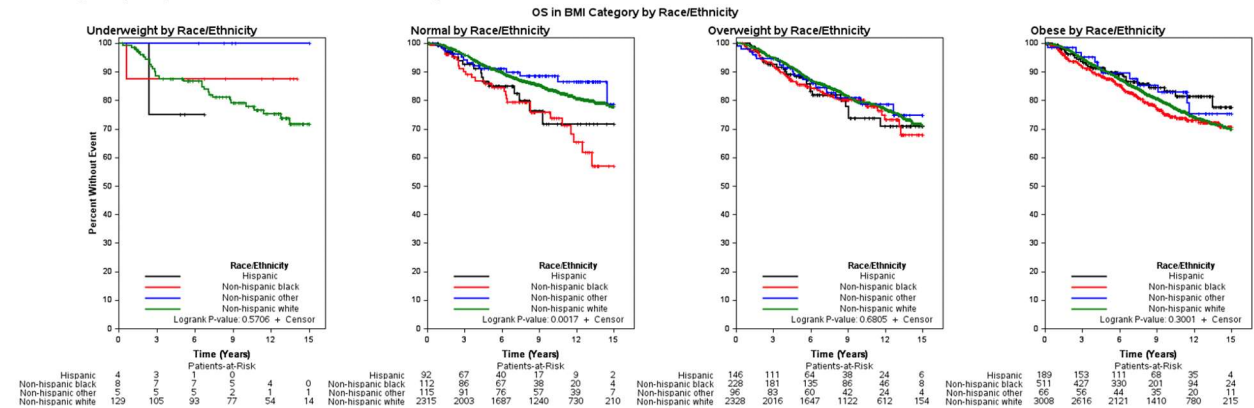

Body Mass Index (BMI) groups were determined based on National Institutes of Health definitions of underweight, normal weight, overweight, and obesity as follows: <18.5, 18.5 to <25, 25 to <30, ≥30 kg/m<sup>2</sup> respectively.<sup>24</sup>

|                                      | Event/Total | Median (95% CI) <sup>1</sup> | Hazard Ratio (95% CI) <sup>2</sup> | Survival Estimates (95% CI) <sup>1</sup>                        | Covariate Level P-values | P-value             |
|--------------------------------------|-------------|------------------------------|------------------------------------|-----------------------------------------------------------------|--------------------------|---------------------|
| <b>Underweight by Race/Ethnicity</b> |             |                              |                                    |                                                                 |                          |                     |
| <b>Race/Ethnicity</b>                |             |                              |                                    |                                                                 |                          |                     |
| Hispanic                             | 1/4         | NE (2.4-NE)                  | 1.89 (0.25-14.18)                  | 5 Years: 75.0 (42.6-100.0%)<br>10 Years: NE (NE-NE%)            | 0.5342 <sup>4</sup>      | 0.5706 <sup>3</sup> |
| Non-hispanic black                   | 1/8         | NE (NE-NE)                   | 0.53 (0.07-3.88)                   | 5 Years: 87.5 (67.3-100.0%)<br>10 Years: 87.5 (67.3-100.0%)     | 0.5312 <sup>4</sup>      |                     |
| Non-hispanic other                   | 0/5         | NE (NE-NE)                   | 0.00 (0.00-)                       | 5 Years: 100.0 (100.0-100.0%)<br>10 Years: 100.0 (100.0-100.0%) | 0.9895 <sup>4</sup>      |                     |
| Non-hispanic white                   | 28/129      | NE (NE-NE)                   | Reference                          | 5 Years: 87.6 (81.9-93.7%)<br>10 Years: 79.0 (71.8-86.9%)       | --                       |                     |
| <b>Normal by Race/Ethnicity</b>      |             |                              |                                    |                                                                 |                          |                     |
| <b>Race/Ethnicity</b>                |             |                              |                                    |                                                                 |                          |                     |
| Hispanic                             | 15/92       | NE (NE-NE)                   | 1.00 (0.95-2.09)                   | 5 Years: 85.0 (77.1-93.7%)<br>10 Years: 71.6 (58.5-87.6%)       | 0.0745 <sup>4</sup>      | 0.0017 <sup>3</sup> |
| Non-hispanic black                   | 27/112      | NE (12.5-NE)                 | 1.93 (1.31-2.86)                   | 5 Years: 85.7 (79.1-93.0%)<br>10 Years: 73.7 (64.4-84.4%)       | 0.0010 <sup>4</sup>      |                     |
| Non-hispanic other                   | 13/115      | NE (NE-NE)                   | 0.78 (0.45-1.36)                   | 5 Years: 91.1 (85.6-96.8%)<br>10 Years: 88.5 (82.3-95.2%)       | 0.3786 <sup>4</sup>      |                     |
| Non-hispanic white                   | 359/2315    | NE (NE-NE)                   | Reference                          | 5 Years: 91.5 (90.3-92.7%)<br>10 Years: 83.6 (82.0-85.3%)       | --                       |                     |
| <b>Overweight by Race/Ethnicity</b>  |             |                              |                                    |                                                                 |                          |                     |
| <b>Race/Ethnicity</b>                |             |                              |                                    |                                                                 |                          |                     |
| Hispanic                             | 25/146      | NE (NE-NE)                   | 1.18 (0.79-1.77)                   | 5 Years: 88.1 (82.7-94.0%)<br>10 Years: 73.8 (64.4-84.6%)       | 0.4115 <sup>4</sup>      | 0.6805 <sup>3</sup> |
| Non-hispanic black                   | 44/228      | NE (NE-NE)                   | 1.16 (0.85-1.59)                   | 5 Years: 85.4 (80.6-90.5%)<br>10 Years: 80.0 (74.4-86.1%)       | 0.3344 <sup>4</sup>      |                     |
| Non-hispanic other                   | 17/96       | NE (NE-NE)                   | 1.01 (0.62-1.64)                   | 5 Years: 88.7 (82.4-95.6%)<br>10 Years: 80.8 (72.2-90.3%)       | 0.9668 <sup>4</sup>      |                     |
| Non-hispanic white                   | 447/2328    | NE (NE-NE)                   | Reference                          | 5 Years: 90.2 (88.9-91.4%)<br>10 Years: 79.3 (77.5-81.2%)       | --                       |                     |
| <b>Obese by Race/Ethnicity</b>       |             |                              |                                    |                                                                 |                          |                     |
| <b>Race/Ethnicity</b>                |             |                              |                                    |                                                                 |                          |                     |
| Hispanic                             | 26/189      | NE (NE-NE)                   | 0.80 (0.54-1.18)                   | 5 Years: 89.8 (85.3-94.5%)<br>10 Years: 83.1 (76.8-89.9%)       | 0.2543 <sup>4</sup>      | 0.3001 <sup>3</sup> |
| Non-hispanic black                   | 106/511     | NE (NE-NE)                   | 1.14 (0.93-1.40)                   | 5 Years: 87.6 (84.7-90.6%)<br>10 Years: 74.7 (70.3-79.3%)       | 0.2141 <sup>4</sup>      |                     |
| Non-hispanic other                   | 11/66       | NE (NE-NE)                   | 0.81 (0.44-1.46)                   | 5 Years: 89.6 (82.0-97.9%)<br>10 Years: 82.8 (73.0-93.9%)       | 0.4763 <sup>4</sup>      |                     |
| Non-hispanic white                   | 607/3008    | NE (NE-NE)                   | Reference                          | 5 Years: 89.8 (88.7-91.0%)<br>10 Years: 78.6 (76.9-80.3%)       | --                       |                     |

<sup>1</sup>Kaplan-Meier method; <sup>2</sup>Cox model; <sup>3</sup>Logrank test; <sup>4</sup>Wald Chi-Square test.

These supplemental Kaplan-Meier estimates show unadjusted survival by subgroup.

**Abbreviations:** RFS, recurrence-free survival; BMI, body mass index.



## eReferences.

1. Muss HB, Berry DA, Cirrincione CT, et al. Adjuvant Chemotherapy in Older Women with Early-Stage Breast Cancer. *New England Journal of Medicine*. 2009;360(20):2055-2065. doi:10.1056/NEJMoa0810266
2. Perez EA, Suman VJ, Davidson NE, et al. Sequential versus concurrent trastuzumab in adjuvant chemotherapy for breast cancer. *J Clin Oncol*. Dec 1 2011;29(34):4491-7. doi:10.1200/jco.2011.36.7045
3. Shulman LN, Berry DA, Cirrincione CT, et al. Comparison of doxorubicin and cyclophosphamide versus single-agent paclitaxel as adjuvant therapy for breast cancer in women with 0 to 3 positive axillary nodes: CALGB 40101 (Alliance). *J Clin Oncol*. Aug 1 2014;32(22):2311-7. doi:10.1200/jco.2013.53.7142
4. Citron ML, Berry DA, Cirrincione C, et al. Randomized trial of dose-dense versus conventionally scheduled and sequential versus concurrent combination chemotherapy as postoperative adjuvant treatment of node-positive primary breast cancer: first report of Intergroup Trial C9741/Cancer and Leukemia Group B Trial 9741. *J Clin Oncol*. Apr 15 2003;21(8):1431-9. doi:10.1200/jco.2003.09.081
