# Supplementary material for: Age, Body Mass Index, Tumor Subtype, and Racial and Ethnic Disparities in Breast Cancer Survival
Source: PubMed Central journal article supplement (PMC10600583; doi:10.1001/jamanetworkopen.2023.39584), 2023-10-25
Supplement: jamanetwopen-e2339584-s002.pdf [file jamanetwopen-e2339584-s002.pdf]

## Data Sharing Statement

Lipsyc-Sharf. Age, Body Mass Index, Tumor Subtype, and Racial and Ethnic Disparities in Breast Cancer Survival. *JAMA Netw Open*. Published October 25, 2023.  
doi:10.1001/jamanetworkopen.2023.39584

### Data

**Data available:** No
